# Supplementary material for: Long-term Follow-up of Psychiatric Disorders in Children and Adolescents Conceived by Assisted Reproductive Techniques in Sweden
Source: PubMed Central journal article supplement (PMC8674804; doi:10.1001/jamapsychiatry.2021.3647), 2021-12-15
Supplement: jamapsychiatry-e213647-s001.pdf [file jamapsychiatry-e213647-s001.pdf]

## Supplementary Online Content

Wang C, Johansson ALV, Rodriguez-Wallberg KA, et al. Long-term follow-up of psychiatric disorders in children and adolescents conceived by assisted reproductive techniques in Sweden. *JAMA Psychiatry*. Published online December 15, 2021. doi:10.1001/jamapsychiatry.2021.3647

**eFigure.** Illustration of Potential Pathways Linking Parental Infertility and Use of ART With Psychiatric Outcomes in Children

**eTable 1.** Overview of Information Used in the Analysis

**eTable 2.** Variable Definitions and Their Sources

**eTable 3.** Parental Characteristics' Association With the Psychiatric Indices

**eTable 4.** Association Between ART and Indices of Psychiatric Health in Individuals With Complete Information

**eTable 5.** Association Between Specific ART Procedures and Indices of Psychiatric Health in Individuals With Complete Information

**eTable 6.** Association Between ART and Different Antidepressant Use in Individuals After Multiple Imputation or Complete Information

**eTable 7.** Association Between ART Specific Procedures and Different Antidepressant Use in Individuals After Multiple Imputation or Complete Information

This supplementary material has been provided by the authors to give readers additional information about their work.

**eFigure.** Illustration of Potential Pathways Linking Parental Infertility and Use of ART With Psychiatric Outcomes in Children

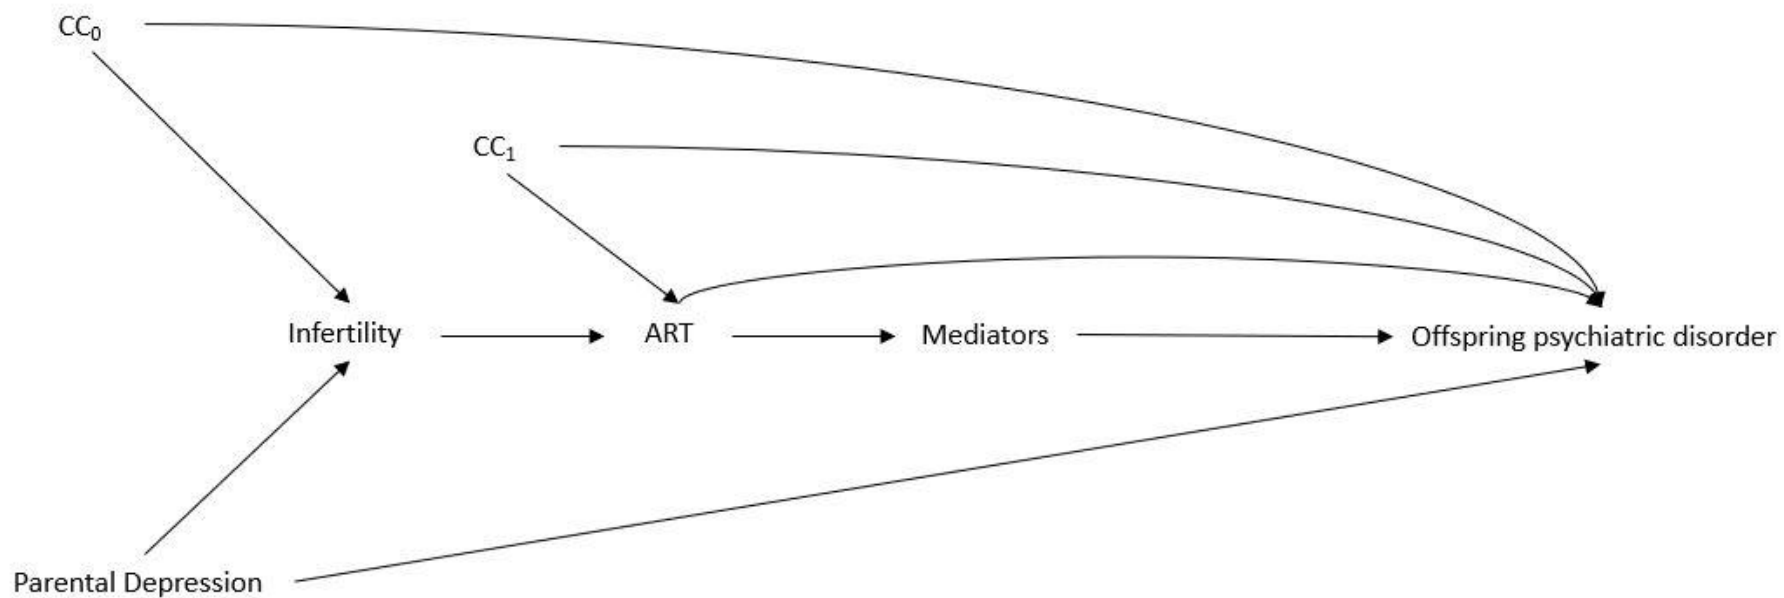

**eTable 1.** Overview of Information Used in the Analysis

| Variable                         | Source                                                              | Definition                                                                                |
|----------------------------------|---------------------------------------------------------------------|-------------------------------------------------------------------------------------------|
| <b>Exposure</b>                  |                                                                     |                                                                                           |
| ART use                          | MBR <sup>a</sup> (maternal and IVF-clinic report), NPR <sup>b</sup> | IVF or IVF combined with ICSI, fresh or frozen-thawed embryo transfer                     |
| <b>Outcome</b>                   |                                                                     |                                                                                           |
| Mood disorder                    | NPR                                                                 | Major depressive disorder and other affective disorders                                   |
| Anxiety                          | NPR                                                                 | OCD <sup>c</sup> and non-OCD                                                              |
| Antidepressant drug use          | PDR <sup>d</sup>                                                    | SSRI <sup>e</sup> and non-SSRI                                                            |
| Suicide                          | NPR, CDR <sup>f</sup>                                               | Suicidal attempts and completed suicide                                                   |
| <b>Covariates</b>                |                                                                     |                                                                                           |
| Parental infertility             | MBR (maternal and IVF-clinic report), NPR                           | Infertility by maternal report, clinical diagnosis in either parent, or record of ART use |
| Year at birth                    | MBR                                                                 | Continuous                                                                                |
| Parental education               | SCB <sup>g</sup>                                                    | Lower secondary, Upper secondary, Post secondary                                          |
| Parental country of birth        | SCB                                                                 | Nordic, other European, non-European                                                      |
| Paternal age at birth            | SCB                                                                 | Less than 25, 25-29,30-34, 35-39, 40 or over 40                                           |
| Maternal age at birth            | MBR                                                                 | Less than 25, 25-29,30-34, 35-39, 40 or over 40                                           |
| Mother region of residence       | SCB                                                                 | East, mid, south, west, north                                                             |
| Parity                           | MBR                                                                 | 1(=no previous child), 2, 3, 4 and more                                                   |
| Maternal smoking early pregnancy | MBR                                                                 | Yes/No                                                                                    |
| Maternal BMI early pregnancy     | MBR                                                                 | <26, ≥26 (overweight)                                                                     |
| Maternal medical conditions      | NPR                                                                 | PCOS <sup>h</sup> or Endometriosis                                                        |
| Parental psychiatric history     | NPR                                                                 | Mood disorders or Non-affective psychosis                                                 |

a: Medical Birth Register; b: National Patient Register; c: Obsessive-Compulsive Disorders; d:

Prescribed Drug Register; e: Selective serotonin reuptake inhibitors; f: Cause of Death Register; g:

Statistic Sweden; h: Polycystic Ovary Syndrome.

**eTable 2.** Variable Definitions and Their Sources

|          |                                | MBR <sup>a</sup>                       | NPR <sup>b</sup> , MBR <sup>a</sup> |      |                                                        |                                           | PDR <sup>c</sup>   | Other Register                                   |
|----------|--------------------------------|----------------------------------------|-------------------------------------|------|--------------------------------------------------------|-------------------------------------------|--------------------|--------------------------------------------------|
|          |                                | Self-report                            | ICD8                                | ICD9 | ICD 10                                                 | Procedure                                 | ATC                | Variables                                        |
| Exposure | Infertility in female          |                                        | 628                                 | 628  | N97                                                    |                                           |                    | IVF-clinic 1982-2006; Quality IVF register 2007- |
|          | Infertility in male            |                                        | 606                                 | 606  | N46                                                    |                                           |                    |                                                  |
|          | Infertility NOS                | since 1982, time-to-pregnancy >=1 year |                                     | V23A | Z35.0                                                  |                                           |                    |                                                  |
|          | IVF                            | since 1995, yes/no                     |                                     |      | Z31.2<br>O26.8A<br>Z31.3<br>Z31.2A<br>Z31.2C<br>Z31.2B | LCA30<br>DL002<br>DL003<br>DL001<br>DL007 |                    |                                                  |
|          | ICSI                           | since 1999, yes/no                     |                                     |      | Z31.2B                                                 | DL001<br>DL007                            |                    |                                                  |
| Outcome  | Mood disorder                  |                                        |                                     |      | F30-F39                                                |                                           |                    |                                                  |
|          | Major depression               |                                        |                                     |      | F32, F33                                               |                                           |                    |                                                  |
|          | Anxiety                        |                                        |                                     |      | F40, F41, F42 (OCD), F93                               |                                           |                    |                                                  |
|          | Antidepressant drugs           |                                        |                                     |      |                                                        |                                           | N06A (SSRI: N06AB) |                                                  |
| Outcome  | Suicide (attempt and complete) |                                        |                                     |      | X60-X84                                                |                                           |                    | X60-X84 in Cause of Death Register               |

|                                                                                | <b>MBR<sup>a</sup></b> | <b>NPR<sup>b</sup>, MBR<sup>a</sup></b> |                        |               |                  | <b>PDR<sup>c</sup></b> | <b>Other Register</b> |
|--------------------------------------------------------------------------------|------------------------|-----------------------------------------|------------------------|---------------|------------------|------------------------|-----------------------|
|                                                                                | <b>Self-report</b>     | <b>ICD8</b>                             | <b>ICD9</b>            | <b>ICD 10</b> | <b>Procedure</b> | <b>ATC</b>             | <b>Variables</b>      |
| Other covariates                                                               |                        |                                         |                        |               |                  |                        |                       |
| Parental psychiatric history<br>(Mood disorder and<br>Non-affective psychosis) |                        | 295-299<br>300.4                        | 295-299<br>311<br>300E | F20-F39       |                  |                        |                       |
| Pre-existing conditions                                                        |                        |                                         |                        |               |                  |                        |                       |
|                                                                                | PCOS                   | 256.9                                   | 256E                   | E28.2         |                  |                        |                       |
|                                                                                | Endometriosis          | 625.3                                   | 617                    | N80           |                  |                        |                       |

a: Medical Birth Register; b: National Patient Register, c: Prescribed Drug Register

**eTable 3.** Parental Characteristics' Association With the Psychiatric Indices

|                                 | Crude hazard ratios (95% Confidence intervals) |                   |                   |                   |
|---------------------------------|------------------------------------------------|-------------------|-------------------|-------------------|
|                                 | Mood disorder                                  | Anxiety           | Antidepressants   | Suicide           |
| <b>Year at birth</b>            |                                                |                   |                   |                   |
| 1994-1996                       | Ref                                            | Ref               | Ref               | Ref               |
| 1997-1999                       | 1.24 (1.21, 1.27)                              | 1.39 (1.36, 1.42) | 1.28 (1.26, 1.30) | 1.07 (1.02, 1.12) |
| 2000-2002                       | 1.62 (1.58, 1.67)                              | 2.03 (1.98, 2.08) | 1.69 (1.65, 1.72) | 1.14 (1.07, 1.21) |
| 2003-2006                       | 2.22 (2.13, 2.31)                              | 2.93 (2.84, 3.03) | 2.39 (2.32, 2.47) | 1.28 (1.17, 1.41) |
| <b>Paternal characteristics</b> |                                                |                   |                   |                   |
| <b>Age at birth</b>             |                                                |                   |                   |                   |
| less than 25                    | 1.38 (1.33, 1.43)                              | 1.37 (1.32, 1.41) | 1.30 (1.27, 1.34) | 1.63 (1.52, 1.75) |
| 25-29                           | Ref                                            | Ref               | Ref               | Ref               |
| 30-34                           | 0.94 (0.92, 0.96)                              | 0.98 (0.96, 1.00) | 0.95 (0.93, 0.96) | 0.83 (0.79, 0.88) |
| 35-39                           | 0.97 (0.94, 0.99)                              | 1.03 (1.01, 1.06) | 0.97 (0.95, 0.99) | 0.88 (0.83, 0.93) |
| 40 or over                      | 1.04 (1.01, 1.07)                              | 1.11 (1.08, 1.15) | 1.05 (1.03, 1.07) | 0.98 (0.92, 1.05) |
| <b>Highest education</b>        |                                                |                   |                   |                   |
| Lower secondary                 | Ref                                            | Ref               | Ref               | Ref               |
| Upper secondary                 | 0.93 (0.90, 0.96)                              | 0.90 (0.87, 0.92) | 0.94 (0.92, 0.96) | 0.74 (0.71, 0.79) |
| Post-secondary                  | 0.86 (0.83, 0.88)                              | 0.81 (0.79, 0.83) | 0.87 (0.85, 0.88) | 0.53 (0.50, 0.56) |
| <b>Country of birth</b>         |                                                |                   |                   |                   |
| Nordic                          | Ref                                            | Ref               | Ref               | Ref               |
| Other European                  | 0.73 (0.70, 0.77)                              | 0.86 (0.83, 0.90) | 0.73 (0.71, 0.76) | 0.89 (0.81, 0.99) |
| Non-European                    | 0.76 (0.73, 0.79)                              | 0.82 (0.79, 0.85) | 0.69 (0.67, 0.71) | 1.08 (1.00, 1.17) |
| <b>Maternal characteristics</b> |                                                |                   |                   |                   |
| <b>Age at birth</b>             |                                                |                   |                   |                   |
| less than 25                    | 1.29 (1.26, 1.33)                              | 1.27 (1.24, 1.30) | 1.22 (1.20, 1.24) | 1.61 (1.53, 1.70) |
| 25-29                           | Ref                                            | Ref               | Ref               | Ref               |
| 30-34                           | 0.99 (0.97, 1.02)                              | 1.03 (1.01, 1.05) | 0.99 (0.98, 1.01) | 0.92 (0.87, 0.97) |
| 35-39                           | 1.06 (1.03, 1.10)                              | 1.15 (1.12, 1.18) | 1.08 (1.06, 1.10) | 1.03 (0.96, 1.10) |
| 40 or over                      | 1.19 (1.12, 1.27)                              | 1.32 (1.25, 1.38) | 1.18 (1.12, 1.23) | 1.24 (1.09, 1.42) |
| <b>Highest education</b>        |                                                |                   |                   |                   |
| Lower secondary                 | Ref                                            | Ref               | Ref               | Ref               |
| Upper secondary                 | 0.86 (0.83, 0.89)                              | 0.81 (0.79, 0.83) | 0.88 (0.86, 0.90) | 0.65 (0.61, 0.69) |
| Post-secondary                  | 0.84 (0.81, 0.87)                              | 0.75 (0.73, 0.77) | 0.85 (0.83, 0.87) | 0.47 (0.44, 0.50) |

|                                     | Crude hazard ratios (95% Confidence intervals) |                   |                   |                   |
|-------------------------------------|------------------------------------------------|-------------------|-------------------|-------------------|
|                                     | Mood disorder                                  | Anxiety           | Antidepressants   | Suicide           |
| <b>Country of birth</b>             |                                                |                   |                   |                   |
| Nordic                              | Ref                                            | Ref               | Ref               | Ref               |
| Other European                      | 0.69 (0.65, 0.74)                              | 0.79 (0.75, 0.83) | 0.69 (0.66, 0.72) | 0.82 (0.73, 0.93) |
| Non-European                        | 0.66 (0.63, 0.69)                              | 0.71 (0.68, 0.74) | 0.59 (0.57, 0.61) | 0.88 (0.81, 0.96) |
| <b>Region of residence</b>          |                                                |                   |                   |                   |
| East                                | Ref                                            | Ref               | Ref               | Ref               |
| Middle                              | 0.91 (0.89, 0.93)                              | 0.86 (0.84, 0.87) | 0.92 (0.91, 0.94) | 0.94 (0.89, 0.99) |
| North                               | 0.98 (0.94, 1.01)                              | 0.81 (0.79, 0.84) | 1.02 (1.00, 1.05) | 0.96 (0.89, 1.04) |
| South                               | 0.70 (0.68, 0.72)                              | 0.76 (0.74, 0.78) | 0.89 (0.87, 0.91) | 0.70 (0.66, 0.75) |
| West                                | 0.83 (0.81, 0.85)                              | 0.76 (0.75, 0.78) | 0.95 (0.93, 0.97) | 0.78 (0.74, 0.83) |
| <b>Parity</b>                       |                                                |                   |                   |                   |
| 1                                   | Ref                                            | Ref               | Ref               | Ref               |
| 2                                   | 0.96 (0.94, 0.98)                              | 0.91 (0.90, 0.93) | 0.95 (0.94, 0.97) | 1.12 (1.07, 1.17) |
| 3                                   | 1.00 (0.98, 1.03)                              | 0.95 (0.93, 0.97) | 0.99 (0.97, 1.01) | 1.26 (1.19, 1.34) |
| 4 and more                          | 1.13 (1.09, 1.18)                              | 1.11 (1.07, 1.14) | 1.12 (1.09, 1.15) | 1.73 (1.61, 1.86) |
| <b>Civil status</b>                 |                                                |                   |                   |                   |
| Co-habiting                         | Ref                                            | Ref               | Ref               | Ref               |
| Living alone                        | 1.62 (1.56, 1.68)                              | 1.61 (1.56, 1.66) | 1.49 (1.45, 1.53) | 2.28 (2.13, 2.44) |
| Smoking                             | 1.53 (1.49, 1.56)                              | 1.49 (1.46, 1.52) | 1.47 (1.44, 1.49) | 2.26 (2.16, 2.37) |
| Overweight or Obese                 | 1.17 (1.15, 1.19)                              | 1.13 (1.11, 1.15) | 1.12 (1.10, 1.14) | 1.24 (1.18, 1.29) |
| <b>Maternal medical conditions</b>  |                                                |                   |                   |                   |
| PCOS                                | 1.52 (1.23, 1.87)                              | 1.64 (1.38, 1.94) | 1.49 (1.28, 1.74) | 1.09 (0.63, 1.87) |
| Endometriosis                       | 1.61 (1.40, 1.87)                              | 1.54 (1.36, 1.75) | 1.59 (1.42, 1.77) | 1.48 (1.06, 2.06) |
| <b>Parental psychiatric history</b> |                                                |                   |                   |                   |
| Mood disorders                      | 2.16 (2.07, 2.26)                              | 2.16 (2.07, 2.25) | 2.01 (1.94, 2.08) | 2.64 (2.42, 2.89) |
| Non affective psychosis             | 1.77 (1.54, 2.04)                              | 1.92 (1.71, 2.16) | 1.67 (1.51, 1.85) | 2.85 (2.24, 3.61) |

**eTable 4.** Association Between ART and Indices of Psychiatric Health in Individuals With Complete Information

|                                                                |                                | Number of Events<br>(exposed/non-exposed) | Crude hazard ratio <sup>a</sup><br>(lower CI, upper CI) | Adjusted hazard ratio <sup>b</sup><br>(lower CI, upper CI) |
|----------------------------------------------------------------|--------------------------------|-------------------------------------------|---------------------------------------------------------|------------------------------------------------------------|
| <b>ART compared to all other</b>                               |                                |                                           |                                                         |                                                            |
|                                                                | Anxiety                        | 1370/56514                                | 0.99 (0.94, 1.04)                                       | 1.04 (0.98, 1.10)                                          |
|                                                                | OCD                            | 242/7752                                  | <b>1.28 (1.13, 1.45)</b>                                | 1.10 (0.96, 1.25)                                          |
|                                                                | Non-OCD                        | 1229/52699                                | 0.95 (0.90, 1.01)                                       | 1.02 (0.97, 1.08)                                          |
|                                                                | Mood disorder                  | 908/43667                                 | <b>0.88 (0.82, 0.94)</b>                                | 0.96 (0.90, 1.03)                                          |
|                                                                | Depression                     | 836/40901                                 | <b>0.88 (0.82, 0.94)</b>                                | 0.96 (0.90, 1.03)                                          |
|                                                                | Severe depression <sup>c</sup> | 748/35146                                 | <b>0.90 (0.84, 0.97)</b>                                | 0.98 (0.91, 1.06)                                          |
|                                                                | Suicide                        | 144/9095                                  | <b>0.70 (0.60, 0.83)</b>                                | 0.94 (0.79, 1.11)                                          |
|                                                                | Antidepressant drug use        | 1865/85888                                | 0.98 (0.93, 1.02)                                       | 1.04 (0.99, 1.09)                                          |
| <b>ART compared to those non ART with parental infertility</b> |                                |                                           |                                                         |                                                            |
|                                                                | Anxiety                        | 1370/5047                                 | <b>0.93 (0.88, 0.99)</b>                                | 0.99 (0.93, 1.05)                                          |
|                                                                | OCD                            | 242/792                                   | 1.11 (0.96, 1.28)                                       | 1.00 (0.86, 1.16)                                          |
|                                                                | Non-OCD                        | 1229/4672                                 | <b>0.91 (0.85, 0.97)</b>                                | 0.98 (0.92, 1.05)                                          |
|                                                                | Mood disorder                  | 908/3766                                  | <b>0.85 (0.79, 0.91)</b>                                | <b>0.92 (0.85, 0.99)</b>                                   |
|                                                                | Depression                     | 836/3709                                  | <b>0.85 (0.79, 0.92)</b>                                | 0.92 (0.85, 1.00)                                          |
|                                                                | Severe depression <sup>c</sup> | 748/3063                                  | <b>0.86 (0.80, 0.94)</b>                                | 0.93 (0.85, 1.01)                                          |
|                                                                | Suicide                        | 144/749                                   | <b>0.70 (0.58, 0.83)</b>                                | 0.83 (0.69, 1.01)                                          |
|                                                                | Antidepressant drug use        | 1865/7696                                 | <b>0.93 (0.89, 0.98)</b>                                | 0.99 (0.94, 1.05)                                          |

ART is assisted reproductive techniques

CI is confidence interval (95%)

OCD is obsessive compulsive disorder

- The model was stratified Cox proportional hazard regression was stratified by birth year.
- The model was also adjusted for parents' age at delivery, origin, highest education, parity, civil status, region of residence, maternal smoking status, maternal overweight and obesity, maternal medical conditions, and parental psychiatric history.
- Diagnosis of depression combined with antidepressant use



**eTable 5.** Association Between Specific ART Procedures and Indices of Psychiatric Health in Individuals With Complete Information

|                                                                                    |                         | Adjusted hazard ratioa (lower CI, upper CI) |                   |                         |                   |
|------------------------------------------------------------------------------------|-------------------------|---------------------------------------------|-------------------|-------------------------|-------------------|
|                                                                                    |                         | Type of fertilization                       |                   | Type of embryo transfer |                   |
|                                                                                    |                         | IVF                                         | ICSI              | Fresh                   | Frozen            |
| <b>ART specific procedures compared to those non ART with parental infertility</b> |                         |                                             |                   |                         |                   |
|                                                                                    | Anxiety                 | 1.01 (0.94, 1.08)                           | 0.94 (0.86, 1.04) | 0.96 (0.90, 1.03)       | 0.98 (0.83, 1.17) |
|                                                                                    | OCD                     | 0.98 (0.82, 1.17)                           | 1.05 (0.84, 1.32) | 1.01 (0.85, 1.19)       | 1.15 (0.79, 1.67) |
|                                                                                    | Non-OCD                 | 1.00 (0.93, 1.08)                           | 0.93 (0.83, 1.03) | 0.95 (0.88, 1.02)       | 0.91 (0.75, 1.11) |
|                                                                                    | Mood disorder           | 0.95 (0.87, 1.03)                           | 0.85 (0.75, 0.96) | 0.89 (0.81, 0.97)       | 0.99 (0.80, 1.23) |
|                                                                                    | Depression              | 0.95 (0.86, 1.04)                           | 0.85 (0.75, 0.97) | 0.89 (0.81, 0.97)       | 1.01 (0.81, 1.25) |
|                                                                                    | Severe depression       | 0.95 (0.86, 1.05)                           | 0.87 (0.76, 1.00) | 0.89 (0.81, 0.98)       | 0.99 (0.78, 1.25) |
|                                                                                    | Suicide                 | 0.87 (0.70, 1.08)                           | 0.77 (0.56, 1.05) | 0.82 (0.67, 1.02)       | 0.71 (0.38, 1.33) |
|                                                                                    | Antidepressant drug use | 0.99 (0.93, 1.05)                           | 0.99 (0.91, 1.08) | 0.98 (0.92, 1.04)       | 1.06 (0.91, 1.22) |
| <b>ART specific procedures directly compared</b>                                   |                         |                                             |                   |                         |                   |
|                                                                                    | Anxiety                 | Ref                                         | 0.93 (0.83, 1.05) | Ref                     | 1.05 (0.87, 1.26) |
|                                                                                    | OCD                     | Ref                                         | 1.00 (0.77, 1.31) | Ref                     | 1.20 (0.81, 1.77) |
|                                                                                    | Non-OCD                 | Ref                                         | 0.92 (0.82, 1.05) | Ref                     | 0.99 (0.81, 1.21) |
|                                                                                    | Mood disorder           | Ref                                         | 0.93 (0.80, 1.07) | Ref                     | 1.19 (0.95, 1.49) |
|                                                                                    | Depression              | Ref                                         | 0.92 (0.80, 1.08) | Ref                     | 1.21 (0.96, 1.52) |
|                                                                                    | Severe depression       | Ref                                         | 0.92 (0.78, 1.08) | Ref                     | 1.18 (0.92, 1.51) |
|                                                                                    | Suicide                 | Ref                                         | 0.96 (0.66, 1.41) | Ref                     | 0.86 (0.45, 1.66) |
|                                                                                    | Antidepressant drug use | Ref                                         | 0.99 (0.90, 1.09) | Ref                     | 1.12 (0.96, 1.31) |

ART is assisted reproductive techniques

CI is confidence interval (95%)

IVF is in-vitro fertilization

ICSI is intracytoplasmic sperm injection

OCD is obsessive compulsive disorder

- a. The model was adjusted for birth year, parents' age at delivery, origin, highest education, parity, civil status, region of residence, maternal smoking status, maternal overweight and obesity, maternal medical conditions, and parental psychiatric history.

**eTable 6.** Association Between ART and Different Antidepressant Use in Individuals After Multiple Imputation or Complete Information

|                                                   | Antidepressants | Number of Events (exposed/non-exposed) | Crude hazard ratio <sup>a</sup> (lower CI, upper CI) | Adjusted hazard ratio <sup>b</sup> (lower CI, upper CI) |
|---------------------------------------------------|-----------------|----------------------------------------|------------------------------------------------------|---------------------------------------------------------|
| <b>Multiple imputation</b>                        |                 |                                        |                                                      |                                                         |
| ART compared to all other                         |                 |                                        |                                                      |                                                         |
|                                                   | SSRIs           | 2165/98149                             | 1.03 (0.99, 1.07)                                    | 1.04 (1.00, 1.09)                                       |
|                                                   | Non-SSRIs       | 727/37721                              | 0.98 (0.91, 1.05)                                    | 1.07 (0.99, 1.15)                                       |
| ART compared to non-ART with parental infertility |                 |                                        |                                                      |                                                         |
|                                                   | SSRIs           | 2165/7799                              | 0.96 (0.92, 1.01)                                    | 0.99 (0.94, 1.04)                                       |
|                                                   | Non-SSRIs       | 727/2901                               | <b>0.90 (0.83, 0.98)</b>                             | 1.00 (0.92, 1.09)                                       |
| ICSI compared to standard IVF                     |                 |                                        |                                                      |                                                         |
|                                                   | SSRIs           | 710/1455                               | 1.02 (0.93, 1.12)                                    | 1.04 (0.95, 1.14)                                       |
|                                                   | Non-SSRIs       | 225/502                                | 1.07 (0.91, 1.26)                                    | 1.08 (0.92, 1.27)                                       |
| Frozen compared to fresh embryo transfer          |                 |                                        |                                                      |                                                         |
|                                                   | SSRIs           | 208/1594                               | 1.09 (0.94, 1.26)                                    | 1.12 (0.97, 1.30)                                       |
|                                                   | Non-SSRIs       | 76/524                                 | 1.25 (0.98, 1.59)                                    | 1.27 (0.99, 1.62)                                       |
| <b>Complete-case analysis</b>                     |                 |                                        |                                                      |                                                         |
| ART compared to all other                         |                 |                                        |                                                      |                                                         |
|                                                   | SSRIs           | 1696/77199                             | 0.98 (0.94, 1.03)                                    | 1.03 (0.98, 1.08)                                       |
|                                                   | Non-SSRIs       | 564/29163                              | 0.94 (0.87, 1.03)                                    | 1.05 (0.97, 1.14)                                       |
| ART compared to non-ART with parental infertility |                 |                                        |                                                      |                                                         |
|                                                   | SSRIs           | 1696/6968                              | <b>0.93 (0.89, 0.99)</b>                             | 0.99 (0.93, 1.04)                                       |
|                                                   | Non-SSRIs       | 564/2567                               | <b>0.89 (0.81, 0.97)</b>                             | 0.98 (0.89, 1.08)                                       |
| ICSI compared to standard IVF                     |                 |                                        |                                                      |                                                         |
|                                                   | SSRIs           | 574/1122                               | 0.96 (0.86, 1.06)                                    | 0.97 (0.87, 1.08)                                       |
|                                                   | Non-SSRIs       | 170/394                                | 0.97 (0.80, 1.17)                                    | 0.96 (0.80, 1.17)                                       |
| Frozen compared to fresh embryo transfer          |                 |                                        |                                                      |                                                         |
|                                                   | SSRIs           | 168/1272                               | 1.05 (0.89, 1.23)                                    | 1.08 (0.92, 1.27)                                       |
|                                                   | Non-SSRIs       | 59/408                                 | 1.22 (0.92, 1.60)                                    | 1.23 (0.93, 1.62)                                       |

ART is assisted reproductive techniques

IVF is in-vitro fertilization

SSRI is selective serotonin receptor inhibitor

CI is confidence interval (95%)

ICSI is intracytoplasmic sperm injection

- The model was stratified Cox proportional hazard regression was stratified by birth year.
- The model was also adjusted for parents' age at delivery, origin, highest education, parity, civil status, region of residence, maternal smoking status, maternal overweight and obesity, maternal medical conditions, and parental psychiatric history.

**eTable 7.** Association Between ART Specific Procedures and Different Antidepressant Use in Individuals After Multiple Imputation or Complete Information

|                                                                       |           | Adjusted hazard ratio <sup>a</sup> (lower CI, upper CI) |                   |                         |                   |
|-----------------------------------------------------------------------|-----------|---------------------------------------------------------|-------------------|-------------------------|-------------------|
|                                                                       |           | Type of fertilization                                   |                   | Type of embryo transfer |                   |
|                                                                       |           | IVF                                                     | ICSI              | Fresh                   | Frozen            |
| <b>Multiple imputation</b>                                            |           |                                                         |                   |                         |                   |
| ART specific procedures compared to non-ART with parental infertility |           |                                                         |                   |                         |                   |
|                                                                       | SSRIs     | 0.97 (0.91, 1.03)                                       | 1.04 (0.96, 1.13) | 0.97 (0.92, 1.03)       | 1.06 (0.92, 1.22) |
|                                                                       | Non-SSRIs | 0.97 (0.88, 1.07)                                       | 1.05 (0.91, 1.21) | 0.94 (0.85, 1.04)       | 1.18 (0.94, 1.49) |
| ART specific procedures directly compared                             |           |                                                         |                   |                         |                   |
|                                                                       | SSRIs     | Ref                                                     | 1.04 (0.95, 1.14) | Ref                     | 1.12 (0.97, 1.30) |
|                                                                       | Non-SSRIs | Ref                                                     | 1.08 (0.92, 1.27) | Ref                     | 1.27 (0.99, 1.62) |
| <b>Complete-case analysis</b>                                         |           |                                                         |                   |                         |                   |
| ART specific procedures compared to non-ART with parental infertility |           |                                                         |                   |                         |                   |
|                                                                       | SSRIs     | 0.99 (0.92, 1.05)                                       | 0.98 (0.89, 1.07) | 0.98 (0.92, 1.04)       | 1.02 (0.88, 1.19) |
|                                                                       | Non-SSRIs | 1.00 (0.89, 1.11)                                       | 0.93 (0.79, 1.10) | 0.93 (0.83, 1.04)       | 1.15 (0.89, 1.49) |
| ART specific procedures directly compared                             |           |                                                         |                   |                         |                   |
|                                                                       | SSRIs     | Ref                                                     | 0.97 (0.87, 1.08) | Ref                     | 1.08 (0.92, 1.27) |
|                                                                       | Non-SSRIs | Ref                                                     | 0.96 (0.80, 1.17) | Ref                     | 1.23 (0.93, 1.62) |

ART is assisted reproductive techniques

CI is confidence interval (95%)

IVF is in-vitro fertilization

ICSI is intracytoplasmic sperm injection

SSRI is selective serotonin receptor inhibitor

- a. The model was adjusted for birth year, parents' age at delivery, origin, highest education, parity, civil status, region of residence, maternal smoking status, maternal overweight and obesity, maternal medical conditions, and parental psychiatric history.
